# Supplementary material for: Environmental change effects on life‐history traits and population dynamics of anadromous fishes
Source: PubMed Central journal article supplement — J Anim Ecol. 2019 May 30;88(8):1178–90. doi: 10.1111/1365-2656.13010 (PMC6771977; doi:10.1111/1365-2656.13010), 2019-05-30
Supplement: JANE-88-1178-s002.pdf [file JANE-88-1178-s002.pdf]

## 1 **Supporting information 1. Physiologically–structured population model**

2 The physiologically–structured population model follows the cohort-based approach for  
3 populations with seasonal reproduction introduced by (Persson et al., 1998). Since  
4 reproduction occurs as a discrete event at a specific time in the year, all individuals that are  
5 born in the same reproductive event are equal. They are collected into a single cohort and  
6 assumed to grow at the same rate. Thus, we can describe the dynamics of each cohort  $i \in \mathbb{N}$   
7 with a system of ordinary differential equations, which keeps track of the density of individuals  
8  $N_i$ , their age  $A_i$ , their structural mass  $W_i$  and their energy reserves storage  $S_i$ . Juveniles are  
9 defined as individuals with structural mass smaller than the structural mass at maturity  $W_p$   
10 and adults as individuals with structural mass equal or larger than  $W_p$ . For each cohort  $i$ , age  
11 is a monotonically increasing function of time,

$$\frac{d}{dt}A_i = 1$$

12 (1)

13 The age of the individuals determines the stage, which in turn, determines the differential  
14 equations that describe the variation in density of individuals, their structural mass and stored  
15 energy reserves. Equations (2), (3) and (4) define the dynamics of eggs, presmolts and  
16 postsmolts, respectively. The density of individuals decreases due to a mortality rate specific  
17 to each stage. In addition, the presmolts and postsmolts may die due to starvation. During the  
18 egg stage the structural mass and storage do not change. The dynamics of the structural  
19 mass and energy reserves storage in presmolts and postsmolts depend on the amount of  
20 food they encounter as well as the breeding travel period if they are adults.

21 for  $0 \leq A_i < a_h$

$$\begin{cases} \frac{d}{dt}N_i = -\mu_e N_i \\ \frac{d}{dt}W_i = 0 \\ \frac{d}{dt}S_i = 0 \end{cases}$$

22

(2)

23

for  $a_h \leq A_i < a_s$ 

$$\left\{ \begin{array}{l} \frac{d}{dt} N_i = \begin{cases} -\mu_r N_i & \text{if } \frac{S_i}{W_i} \geq q_s \\ -\left( \mu_r N_i + \varphi \left( q_s \frac{W_i}{S_i} - 1 \right) \right) & \text{if } S_i > 0 \text{ and } \frac{S_i}{W_i} < q_s \\ -\infty & \text{otherwise} \end{cases} \\ \frac{d}{dt} W_i = \begin{cases} \zeta_w \left( \kappa \frac{R_r}{K + R_r} j_a W_i^{2/3} - j_m W_i \right) & \text{if } \kappa \frac{R_r}{K + R_r} j_a W_i^{2/3} > j_m W_i \\ 0 & \text{otherwise} \end{cases} \\ \frac{d}{dt} S_i = \begin{cases} (1 - \kappa) \frac{R_r}{K + R_r} j_a W_i^{2/3} & \text{if } \kappa \frac{R_r}{K + R_r} j_a W_i^{2/3} > j_m W_i \\ \frac{R_r}{K + R_r} j_a W_i^{2/3} - j_m W_i & \text{otherwise} \end{cases} \end{array} \right.$$

24

25

(3)

26

for  $a_s \leq A_i$ 

$$\left\{ \begin{array}{l} \frac{d}{dt} N_i = \begin{cases} -\mu_s N_i & \text{if } \frac{S_i}{W_i} \geq q_s \\ -\left( \mu_s N_i + \varphi \left( q_s \frac{W_i}{S_i} - 1 \right) \right) & \text{if } S_i > 0 \text{ and } \frac{S_i}{W_i} < q_s \\ -\infty & \text{otherwise} \end{cases} \\ \frac{d}{dt} W_i = \begin{cases} \zeta_w \left( \kappa f_s j_a W_i^{2/3} - j_m W_i \right) & \text{if } c1 \text{ and } (\sim c2 \text{ or } \sim c3) \\ 0 & \text{otherwise} \end{cases} \\ \frac{d}{dt} S_i = \begin{cases} (1 - \kappa) f_s j_a W_i^{2/3} & \text{if } c1 \text{ and } (\sim c2 \text{ or } \sim c3) \\ f_s j_a W_i^{2/3} - j_m W_i & \text{if } \sim c1 \text{ and } (\sim c2 \text{ or } \sim c3) \\ -(j_m W_i + C j_m W_i) & \text{otherwise} \end{cases} \end{array} \right.$$

27

(4)

28 In this last equation  $c1$ ,  $c2$  and  $c3$  are the conditions  $\kappa f_s j_a W_i^{2/3} > j_m W_i$ ,  $t_{um} \leq t \leq t_{dm}$ , and29  $W_p \leq W_i$ , respectively, while  $\sim c1$ ,  $\sim c2$  and  $\sim c3$  refer to the situation that these conditions do

30 not hold. When the conditions are true, the amount of assimilates necessary to meet

31 metabolic maintenance from the  $\kappa$  fraction are enough ( $c1$ ), the current time corresponds to  
 32 the breeding travel period ( $c2$ ) and the cohort is adult ( $c3$ ).

33 Whenever a juvenile cohort reaches the maturation size  $W_i = W_p$ , at a particular time  $t = t_p$ , a  
 34 maturation event occurs. At a maturation event, the juvenile cohort becomes an adult cohort.

35 This does not affect any cohort statistics:

$$\begin{cases} A_i(t_p) = A_i(t_p^-) \\ N_i(t_p) = N_i(t_p^-) \\ W_i(t_p) = W_i(t_p^-) \\ S_i(t_p) = S_i(t_p^-) \end{cases}$$

36 (5)

37 Reproduction occurs instantaneously at  $t_{rn} = n t_y + t_r$ , where  $n \in \mathbb{N}$ . At a reproductive event,  
 38 a new cohort is formed from the storage biomass of adults, but only if their storage is such  
 39 that their current storage:structural mass ratio exceeds the storage:structural mass ratio with  
 40 which the adult individual matured:

$$\begin{cases} A_0(t_{rn}) = 0 \\ N_0(t_{rn}) = \left( \sum_{i \in \{j \leq n | W_j \geq W_p\}} N_i \cdot \max\left(S_i - \frac{S_p}{W_p} W_i, 0\right) \right) \frac{\zeta_e}{W_b} \\ W_0(t_{rn}) = \kappa W_b \\ S_0(t_{rn}) = (1 - \kappa) W_b \end{cases}$$

41 (6)

42 At the same time, all other cohorts are renumbered and the energy reserves storage of the  
 43 adults that do reproduce is set to the amount that makes their storage:structural mass ratio  
 44 equal to their storage:structural mass ratio at maturation.

$$\begin{cases} A_{i+1}(t_{rn}) = A_i(t_{rn}^-) \\ N_{i+1}(t_{rn}) = N_i(t_{rn}^-) \\ W_{i+1}(t_{rn}) = W_i(t_{rn}^-) \\ S_{i+1}(t_{rn}) = \begin{cases} \min\left(S_i(t_{rn}^-), \frac{S_p}{W_p} W_i(t_{rn}^-)\right) & \text{if } W_i \geq W_p \\ S_i(t_{rn}^-) & \text{otherwise} \end{cases} \end{cases}$$

45 (7)

46 The resource density in the breeding habitat grows following a semi-chemostat growth and  
 47 declines by foraging of presmolts (8).

$$\frac{d}{dt} R_r = \rho(R_{max} - R_r) - \frac{R_r}{K + R_r} j_a \sum_{i \in \{j \leq n \mid a_h < a_j < a_s\}} N_i W_i^{2/3}$$

48 (8)

49

## 50 **Supporting information 2. Intracohort variation in growth rate**

51 Figure SI2.1. Effects of variation in feeding level in the non-breeding habitat (top row), annual  
52 survival of postmolts (middle row) and cost of the breeding travel (bottom row) on life history  
53 traits of postmolts (solid lines in left column plots), population reproductive output (dashed  
54 lines in left column plots), food availability in the breeding habitat (solid lines in right column  
55 plots) and growth rate of presmolts (dashed lines in right column plots). Colored lines  
56 correspond to a population formulation without intracohort variation (lines redrawn from figure  
57 2 in the main text) while black lines correspond to a model formulation in which within a year  
58 class the parameter  $j_a$  follows a truncated normal distribution ranging from 80% to 120% of its  
59 mean. Default values representing favorable conditions (feeding level in the non-breeding  
60 habitat = 1, annual survival of postmolts = 0.1 and cost of the breeding travel = 0) are used  
61 for parameters that are not varied.  $R_{max} = 5 \text{ g m}^{-3}$ , other parameter values as in table 2. The  
62 values correspond to the average population statistics after the transient dynamics have  
63 disappeared.

64 Figure SI2.2. Effects of variation in feeding level in the non-breeding habitat (top row), annual  
65 survival of postmolts (middle row) and cost of the breeding travel (bottom row) on sea-age  
66 (left) and body length at first spawning (right). Same parameters as in figure SI2.1. Colored  
67 lines correspond to a population formulation without intracohort variation (lines redrawn from  
68 figure 3 in the main text) while black lines correspond to a model formulation in which within a  
69 year class the parameter  $j_a$  follows a truncated normal distribution ranging from 80% to 120%  
70 of its mean. The black dashed lines show the average body length at first spawning and the  
71 shaded areas show the frequency distribution of body lengths at first spawning within the  
72 population. The transition from 2 to 1 year of age at first spawning when the food abundance  
73 and the survival in the non-breeding habitat decrease coincides with a bimodal distribution of  
74 body length at first spawning in the population. The values correspond to the average  
75 population statistics after the transient dynamics have disappeared.

76 Figure SI2.3. a) Effect of feeding level in the non-breeding habitat, b) annual survival of  
77 postmolts and c) cost of the breeding travel on population biomass dynamics. Colored lines  
78 correspond to a population formulation without intracohort variation (lines redrawn from figure

79 4 in the main text) while black lines correspond to a model formulation in which within a year  
80 class the parameter  $j_a$  follows a truncated normal distribution ranging from 80% to 120% of its  
81 mean. Default values representing favorable conditions (feeding level in the non-breeding  
82 habitat = 1, annual survival of postsmolts = 0.1 and cost of the breeding travel = 0) are used  
83 for parameters that are not varied.  $R_{max} = 8 \text{ g m}^{-3}$ , other parameter values as in table 2. The  
84 values correspond to the population biomass census occurring every year at the time of  
85 hatching after the transient dynamics have disappeared.

86 **Supporting information 3.**

87 Figure SI3.1. Types of dynamics (left column) and total biomass (right column) of a population  
88 exposed to different feeding levels in the non-breeding habitat (top row), cost of the breeding  
89 travel (middle row) and survival of postsmolts (bottom row) and variation in maximum food  
90 density in the breeding habitat (horizontal axes). Default values representing favorable  
91 conditions (annual survival of postsmolts = 0.1 and cost of the breeding travel = 0) are used  
92 for parameters that are not varied. Feeding level equals 0.6 and 0.8 in middle and bottom plot  
93 respectively. The values correspond to the average population statistics after the transient  
94 dynamics have disappeared.

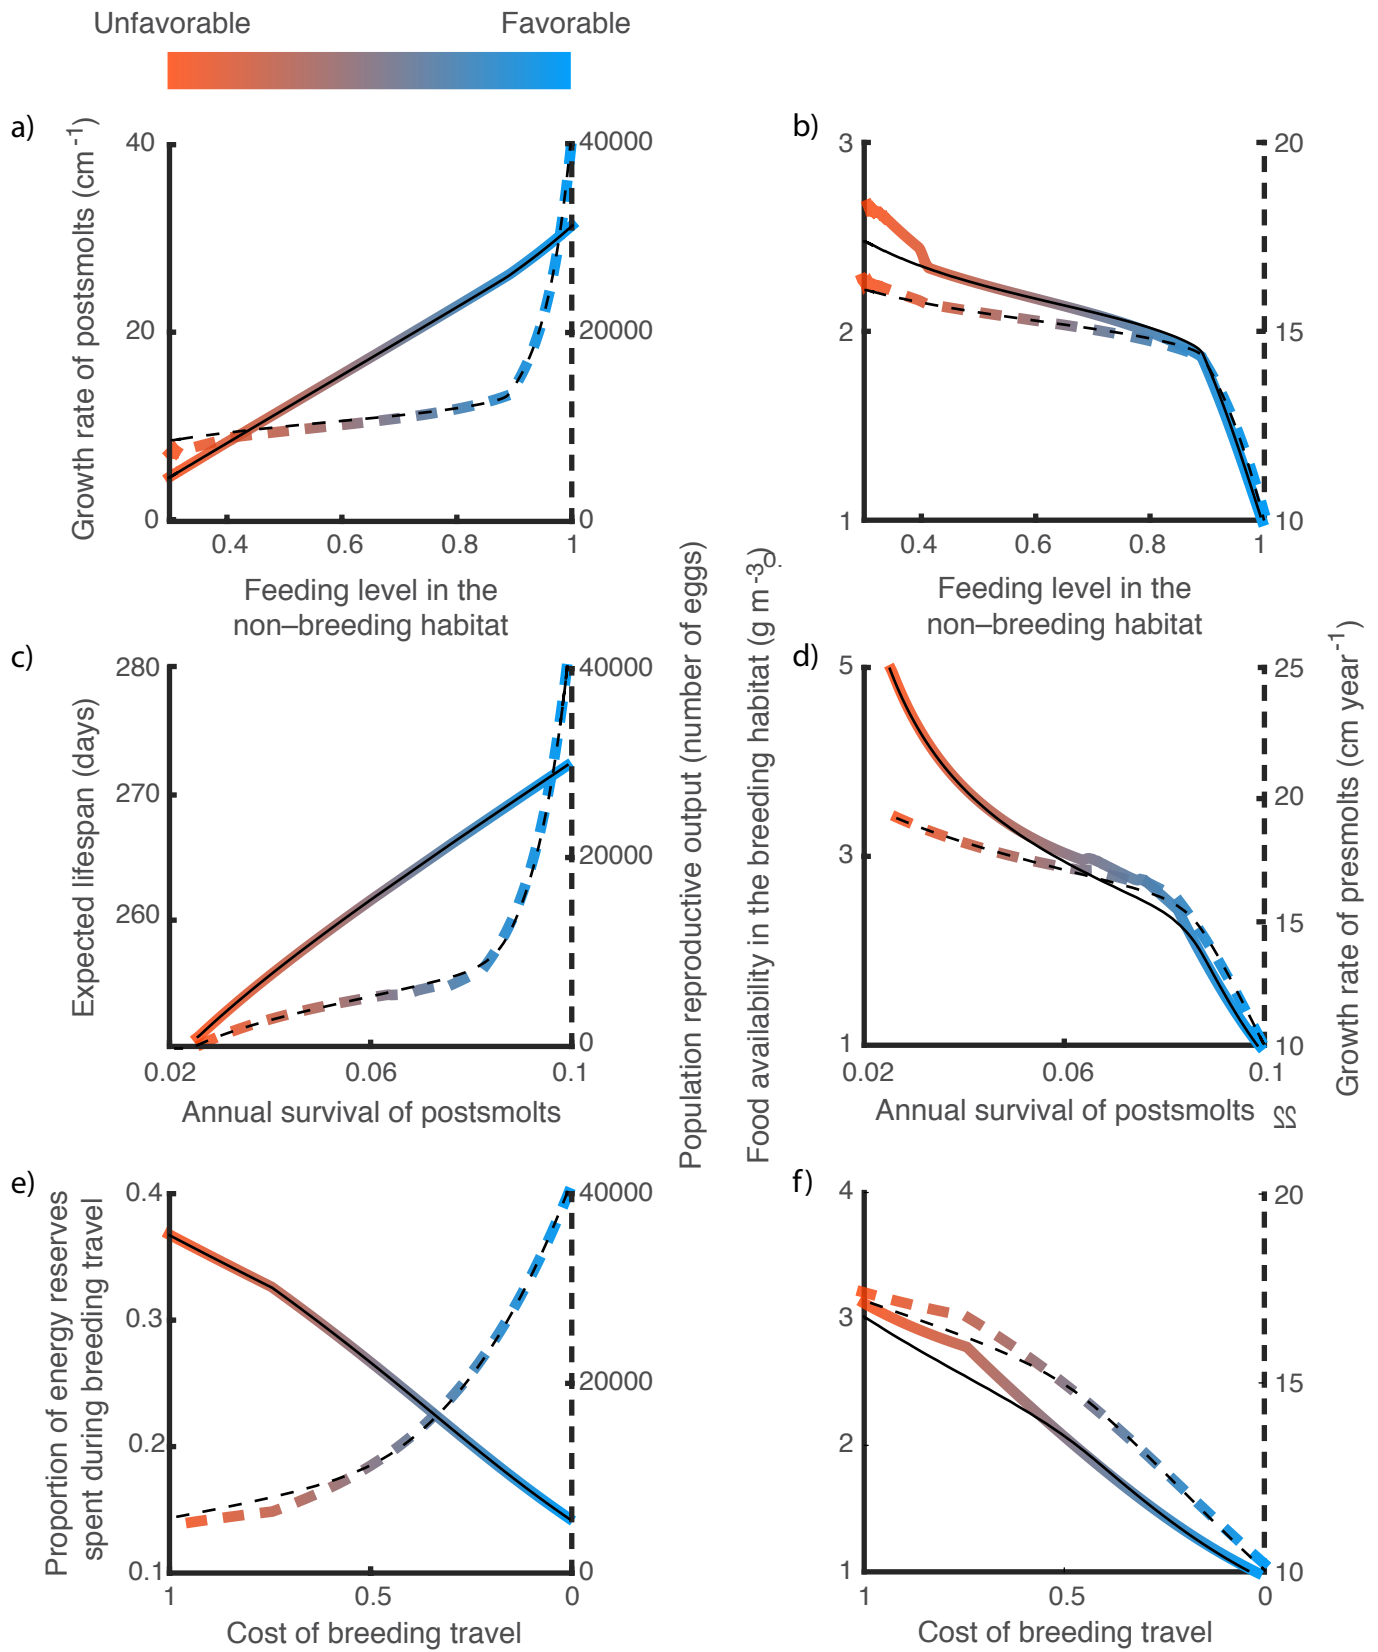

Figure SI2.1.



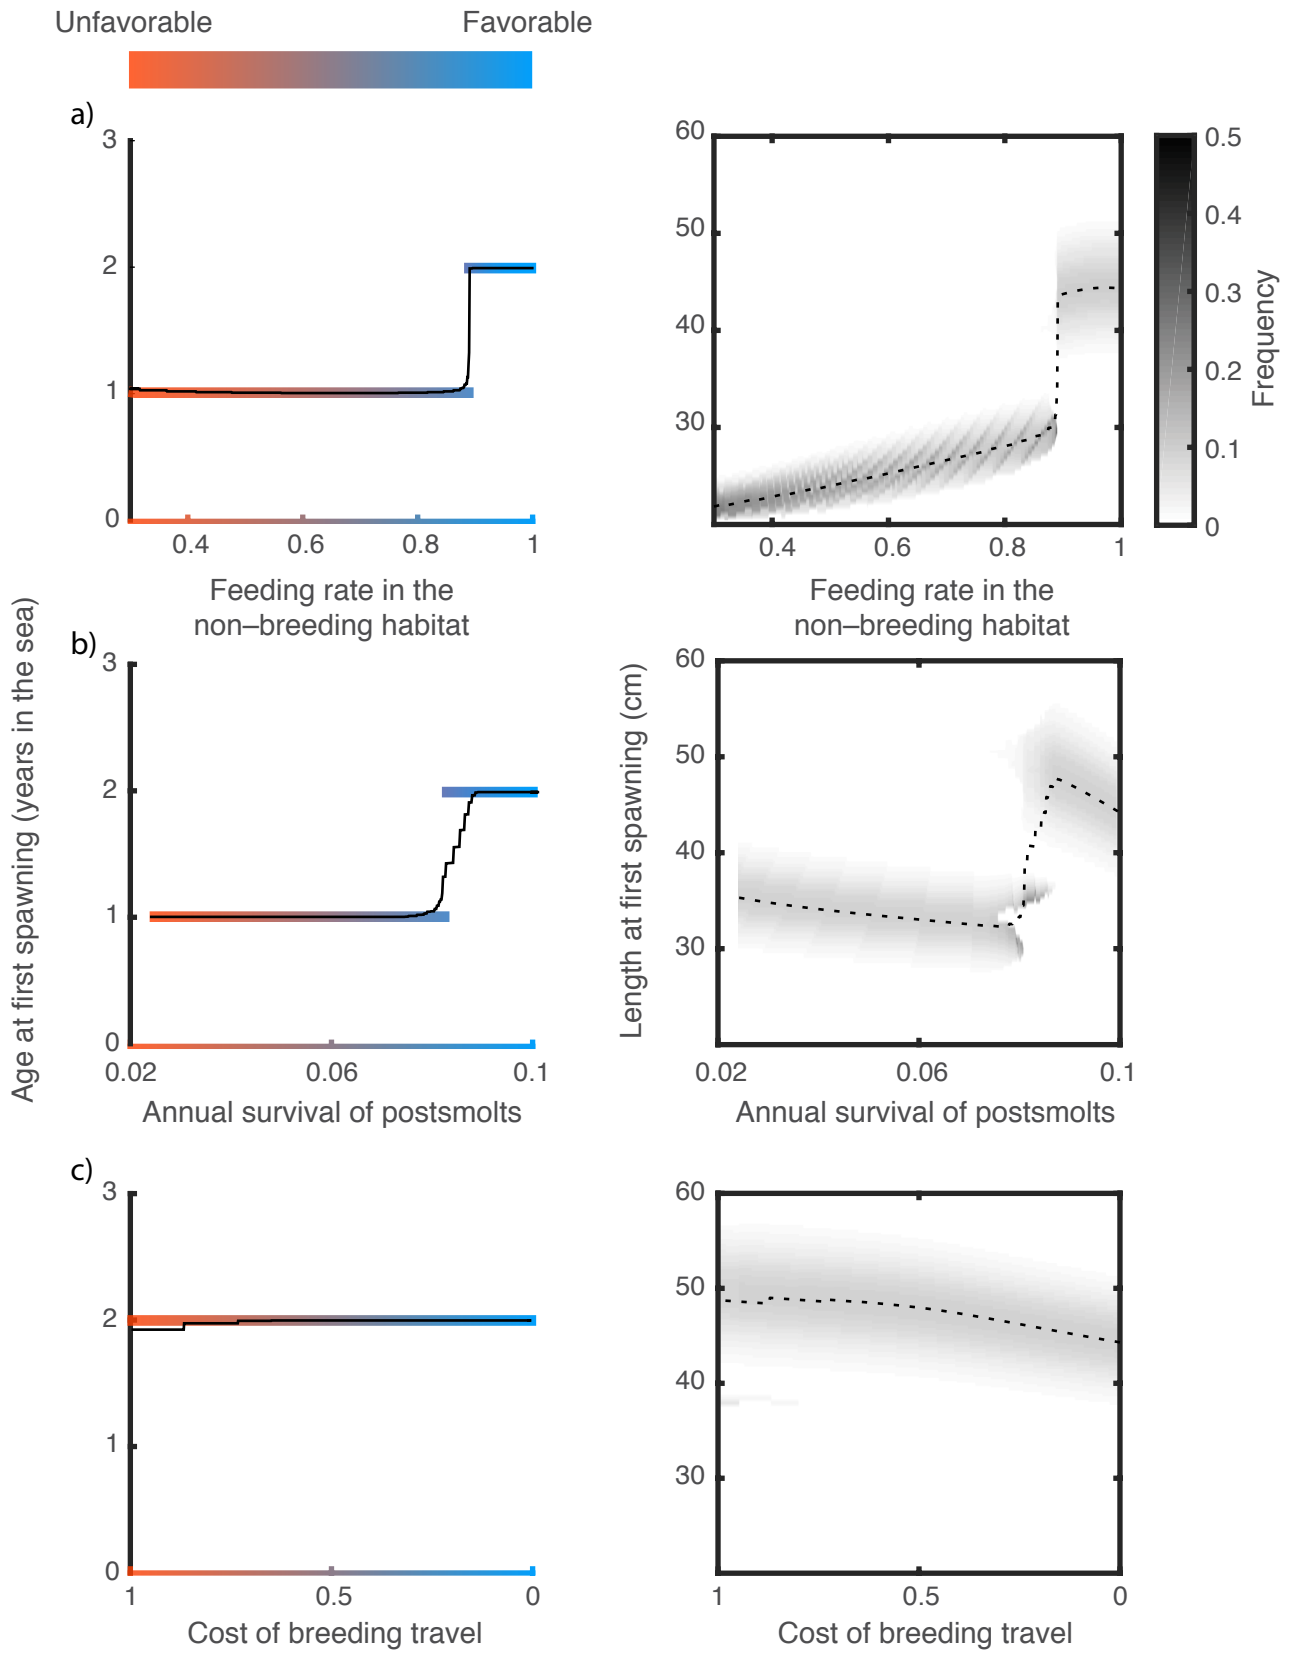

Figure S12.2

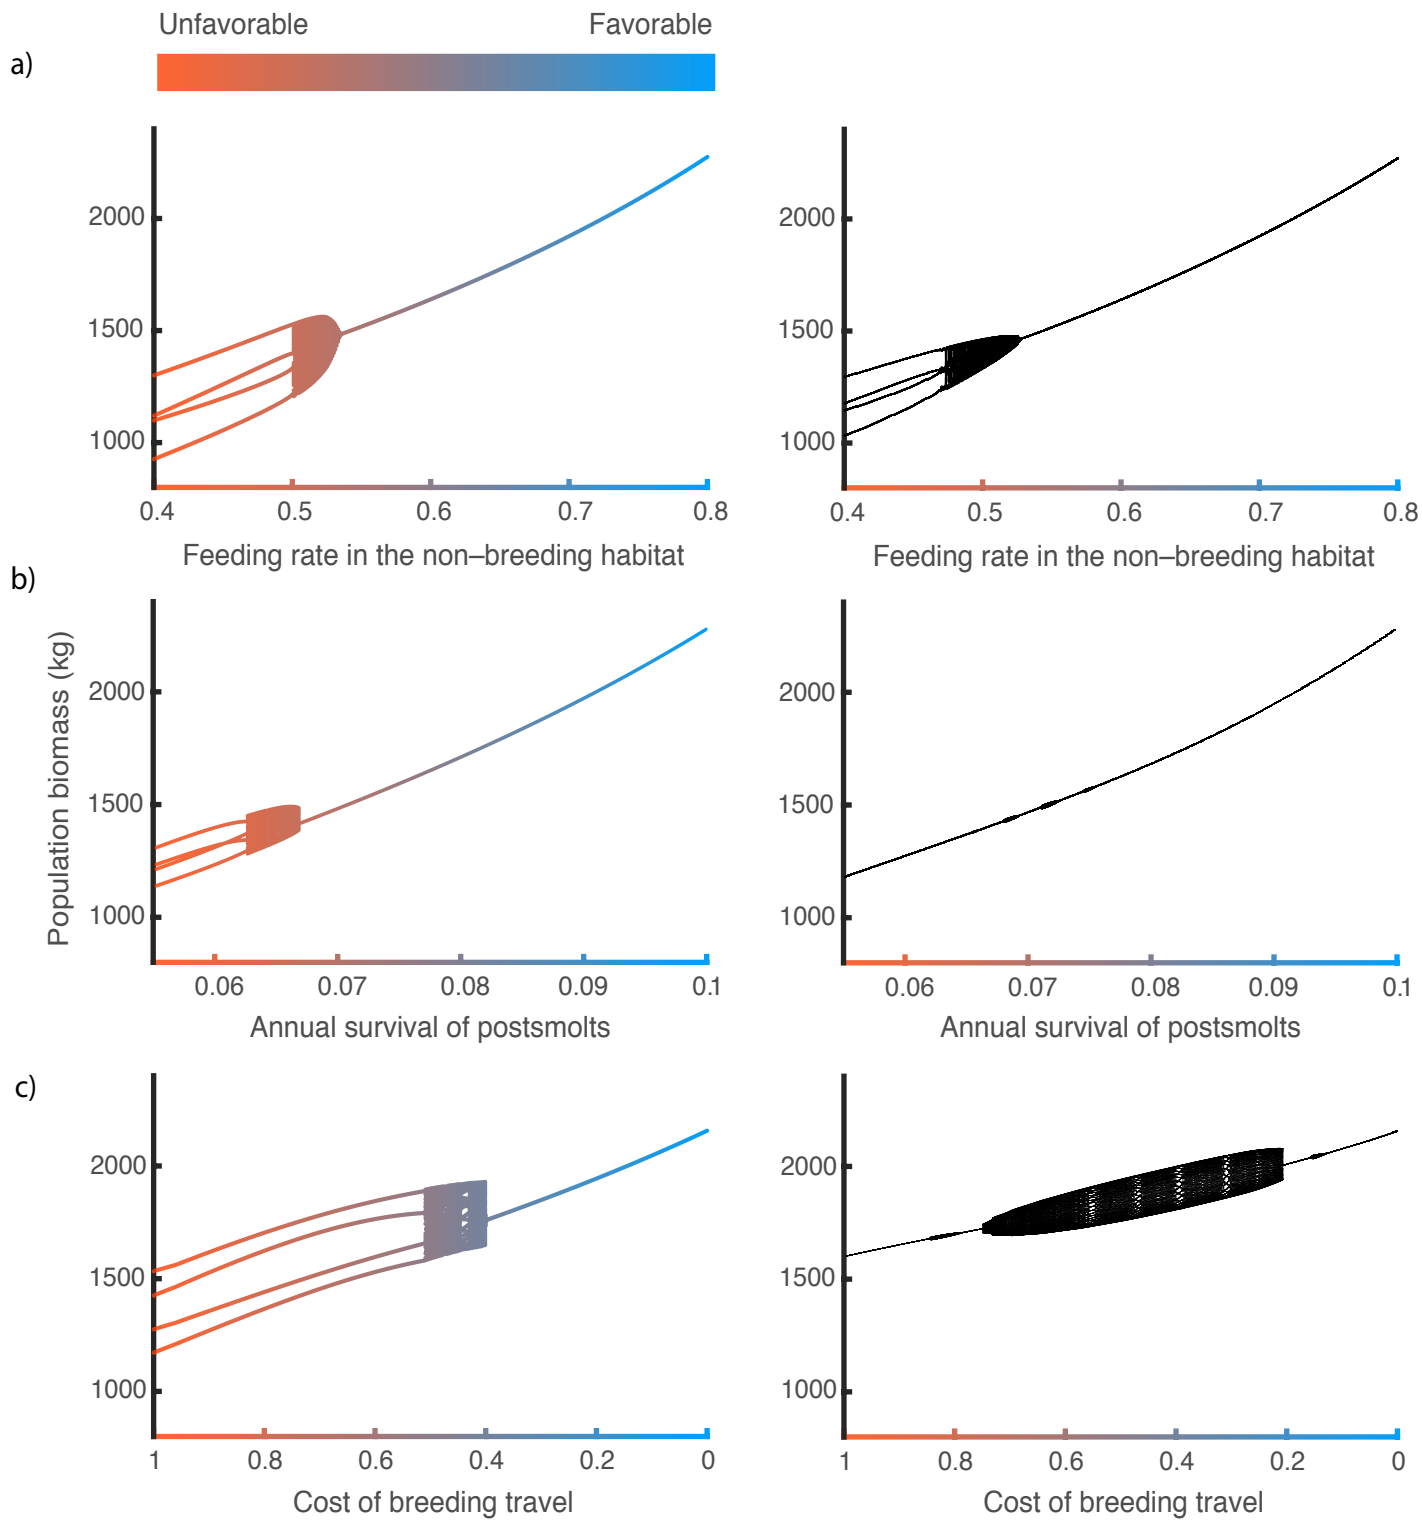

Figure SI2.3

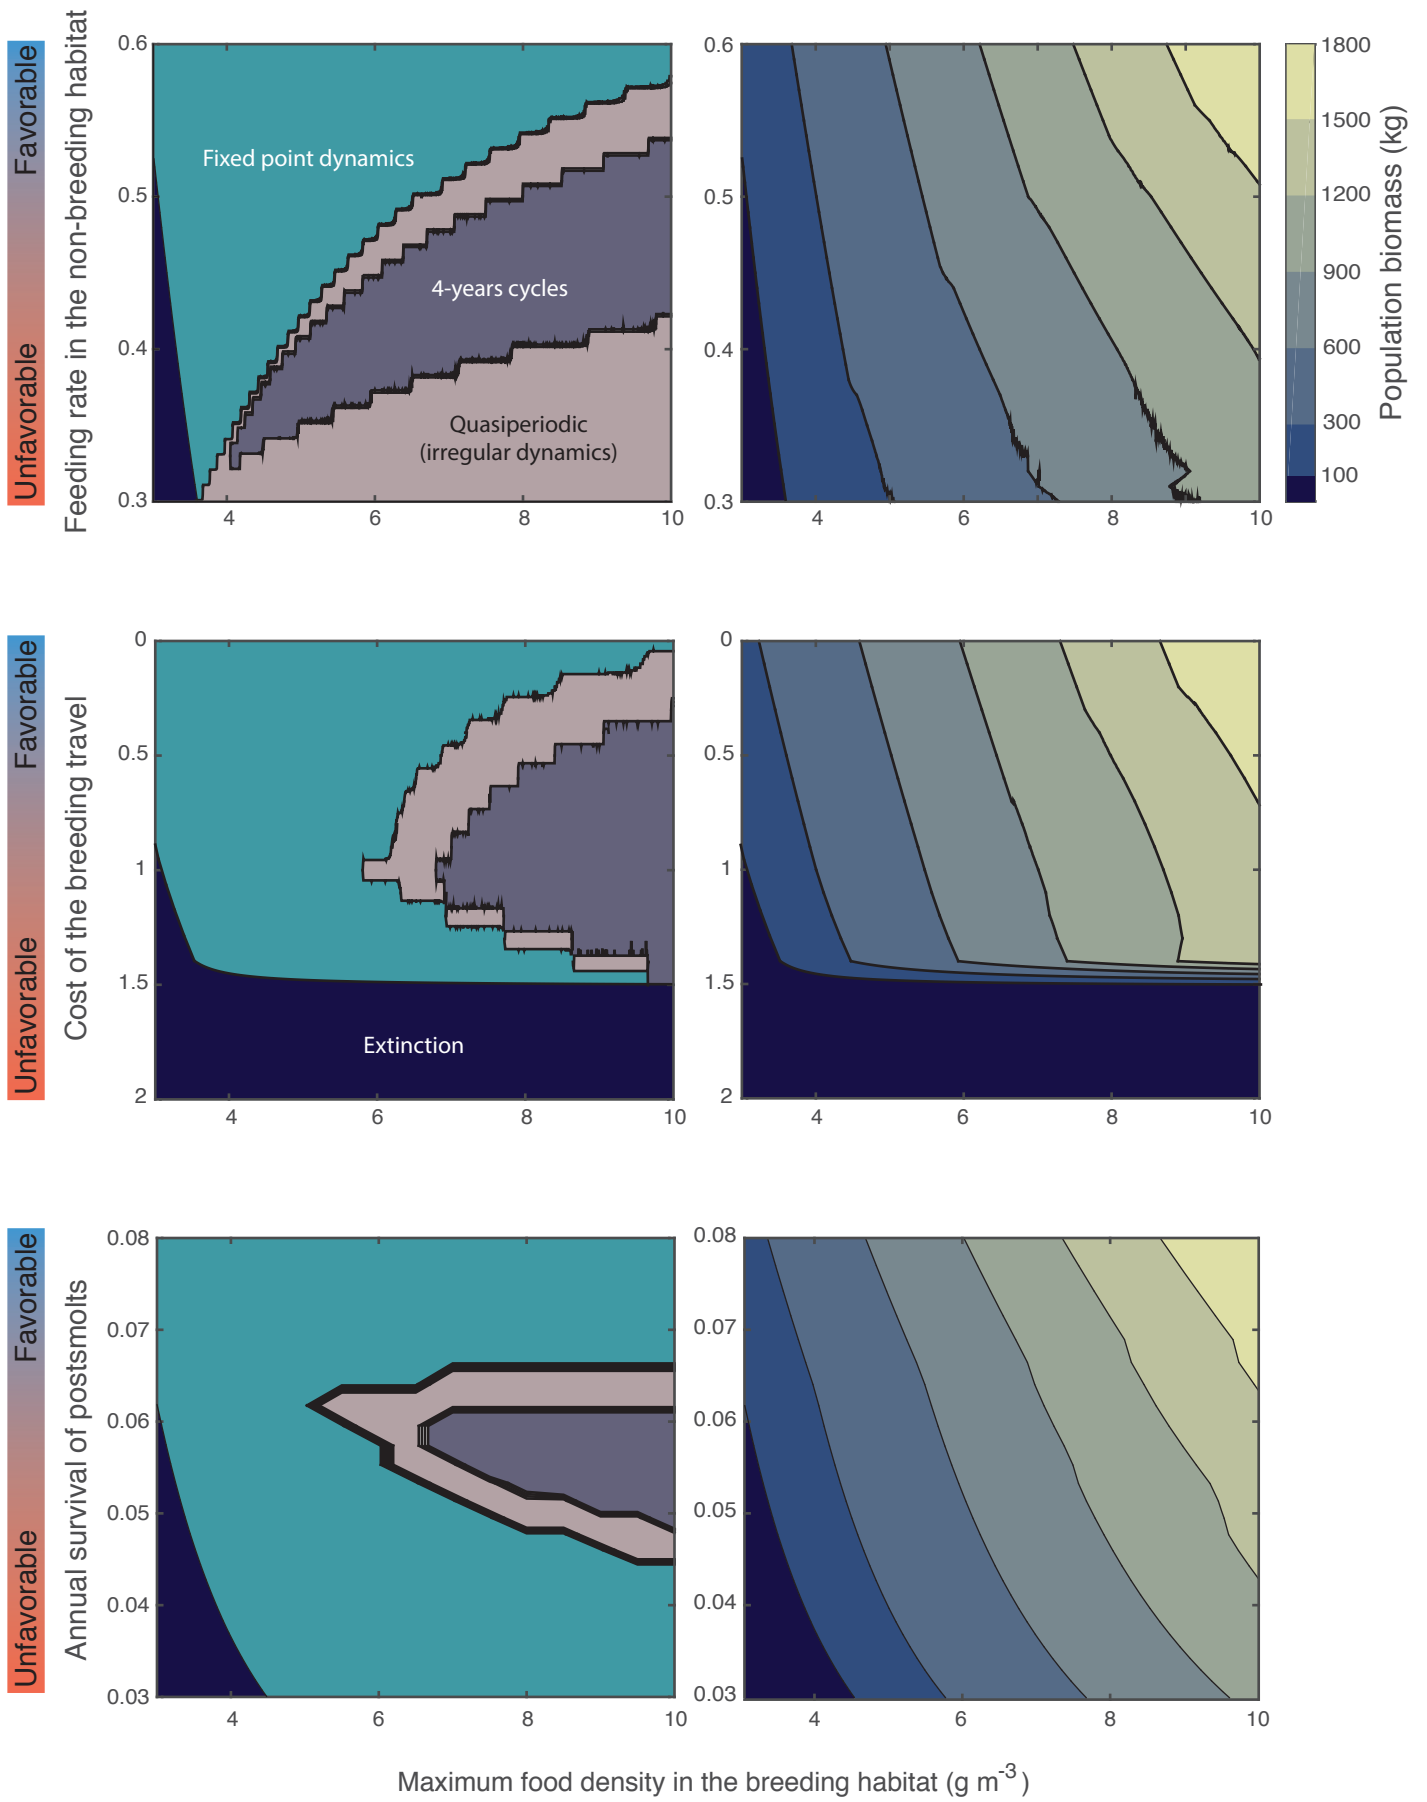

Figure SI3.1.
