# Supplementary figures and images for: Environmental change effects on life‐history traits and population dynamics of anadromous fishes
Source: PubMed Central journal article supplement — J Anim Ecol. 2019 May 30;88(8):1178–90. doi: 10.1111/1365-2656.13010 (PMC6771977; doi:10.1111/1365-2656.13010), 2019-05-30

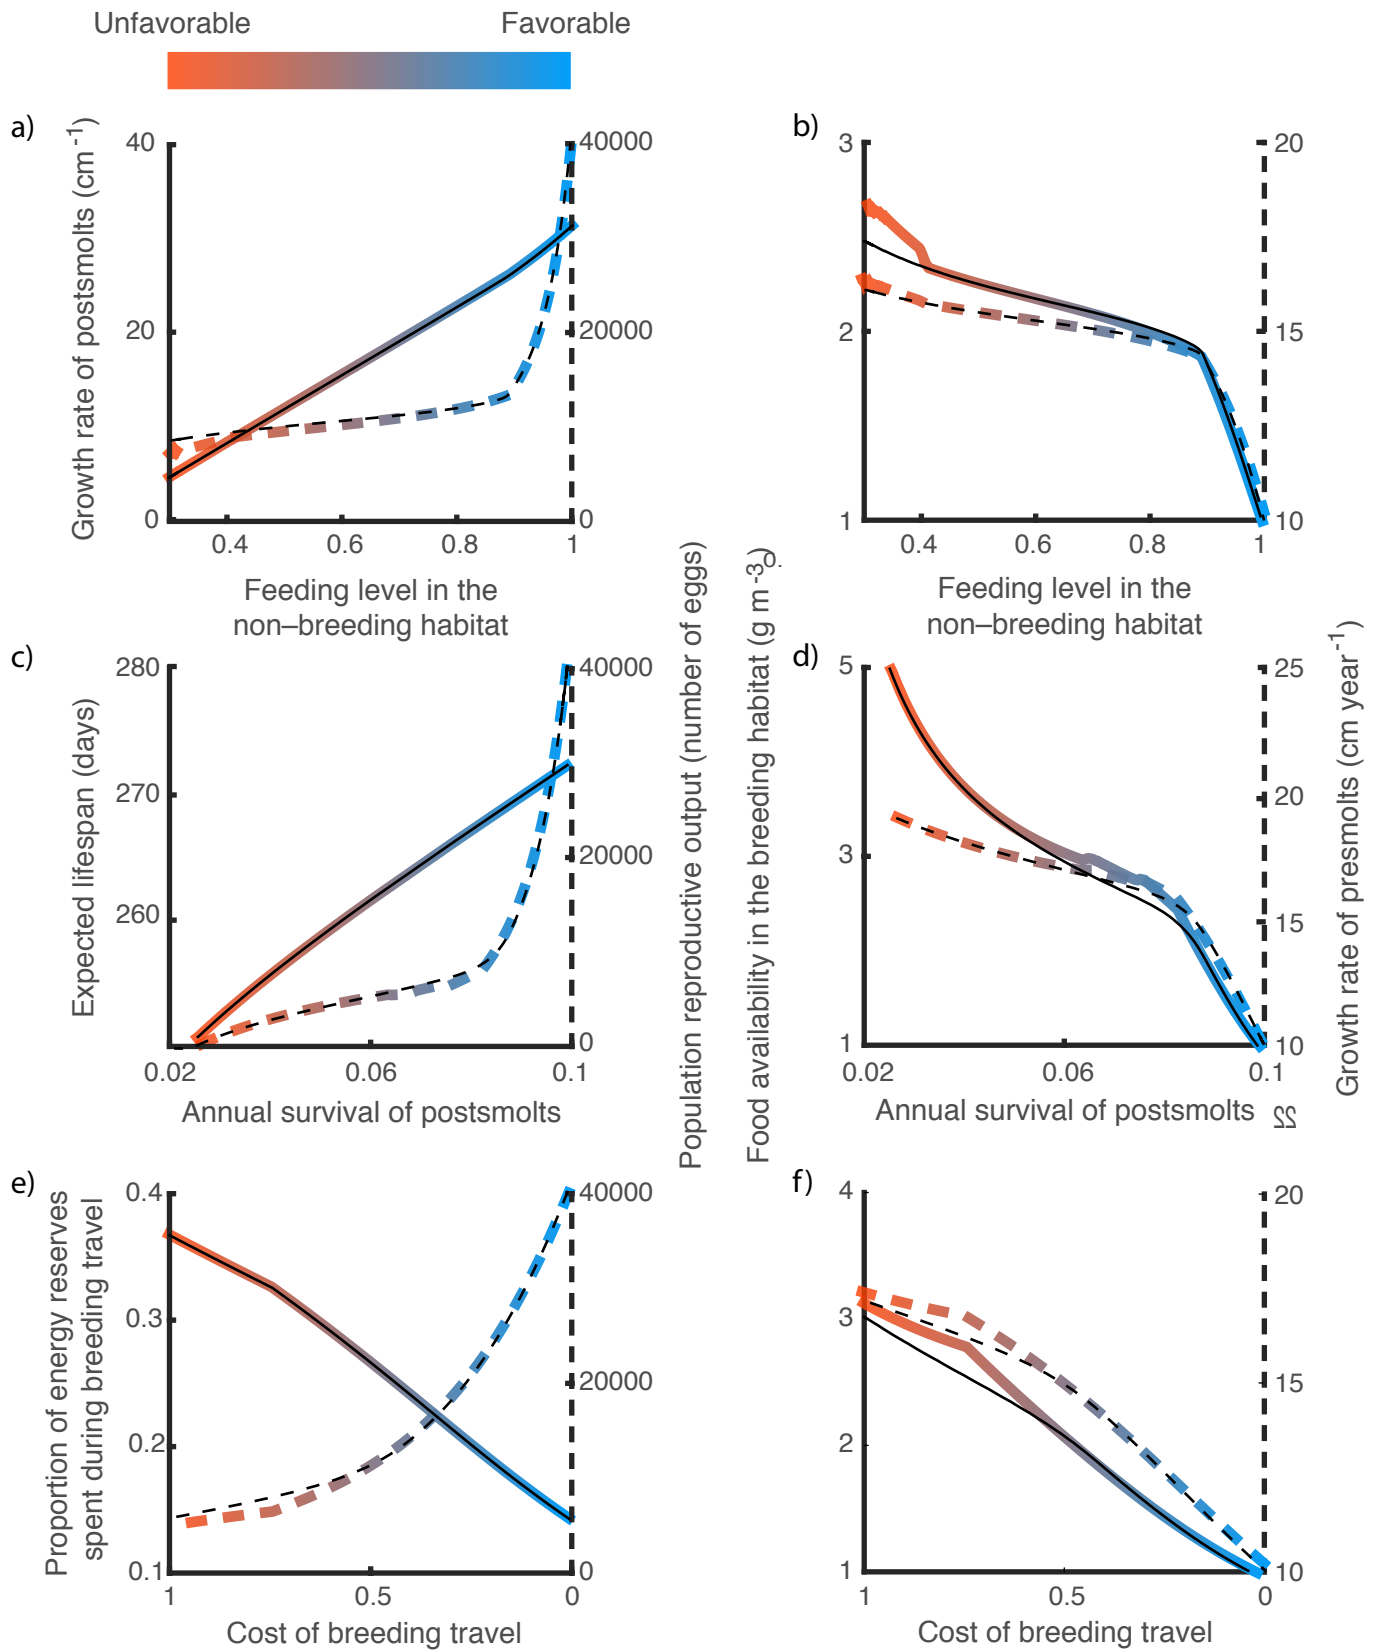

Figure SI2.1.

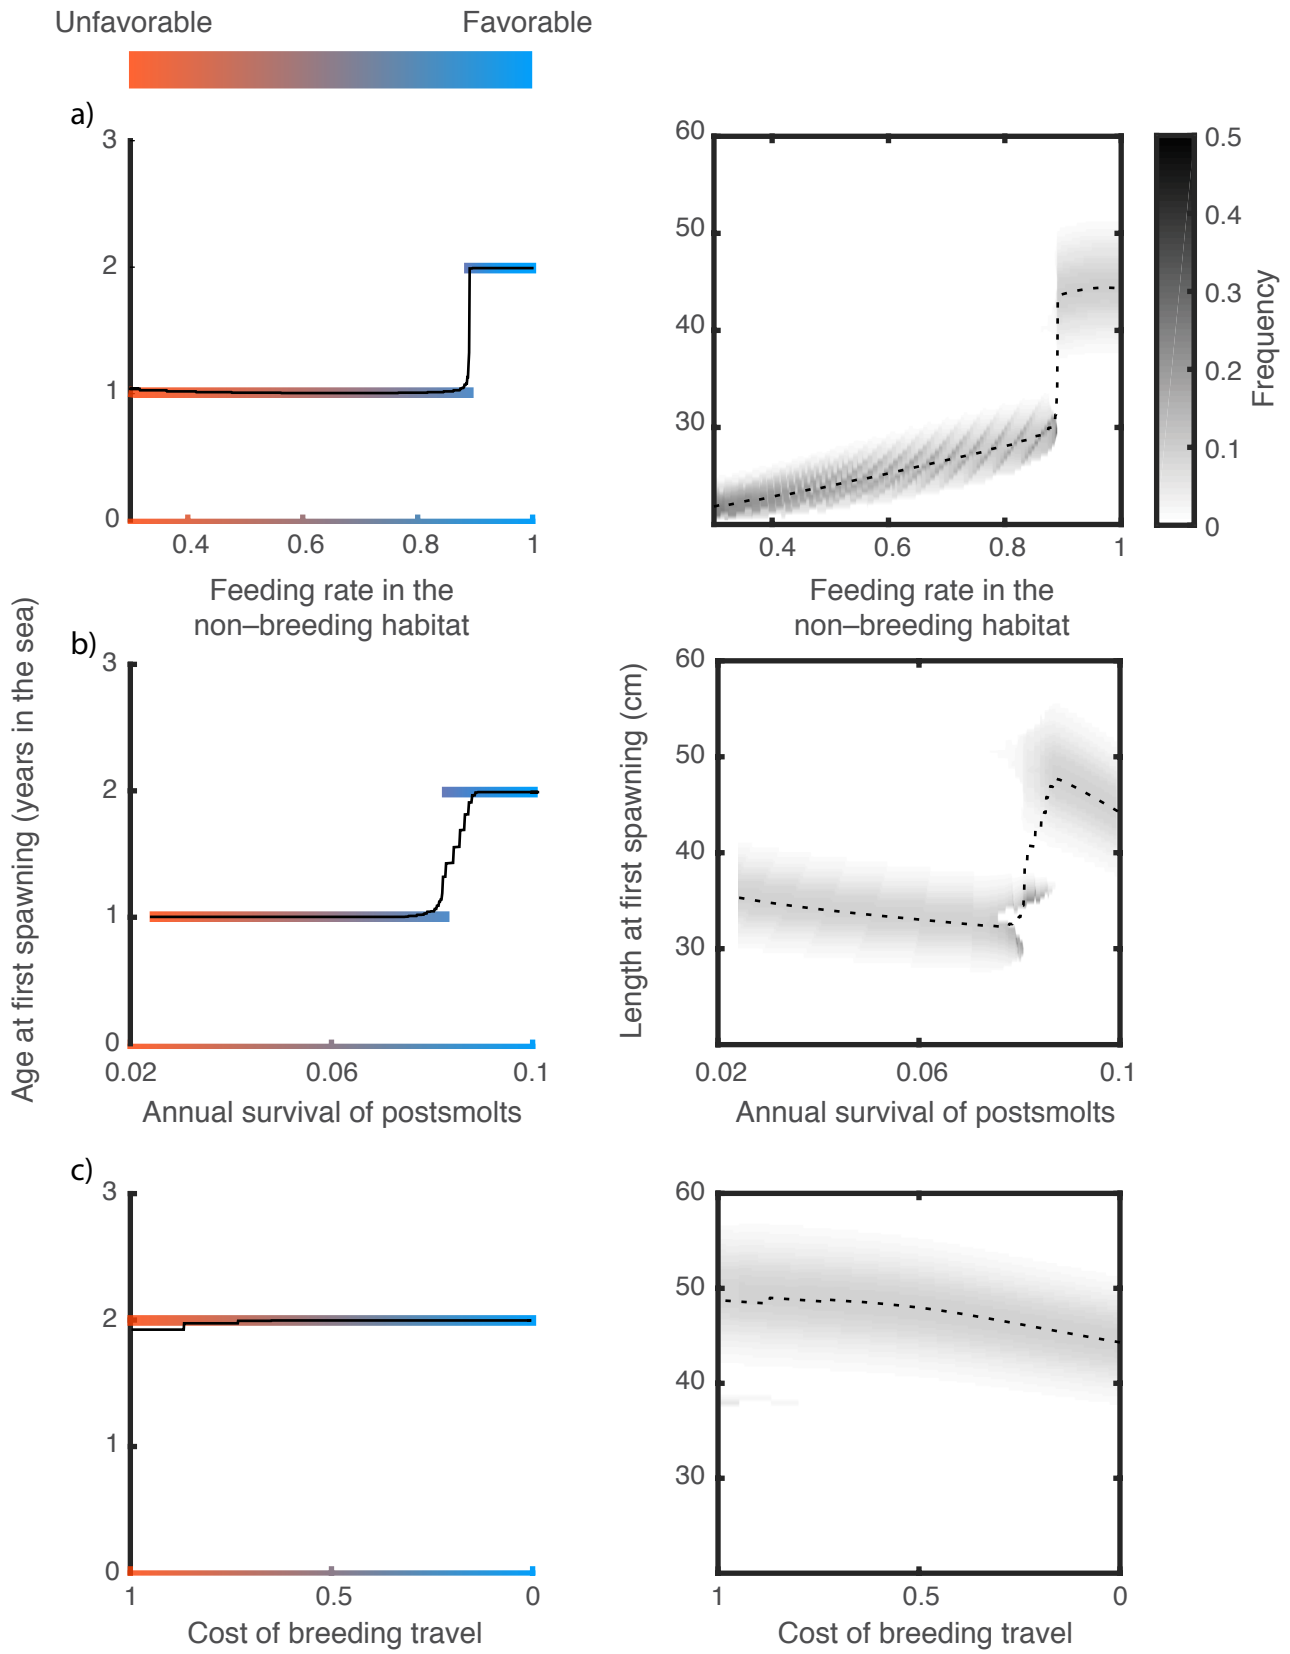

Figure S12.2

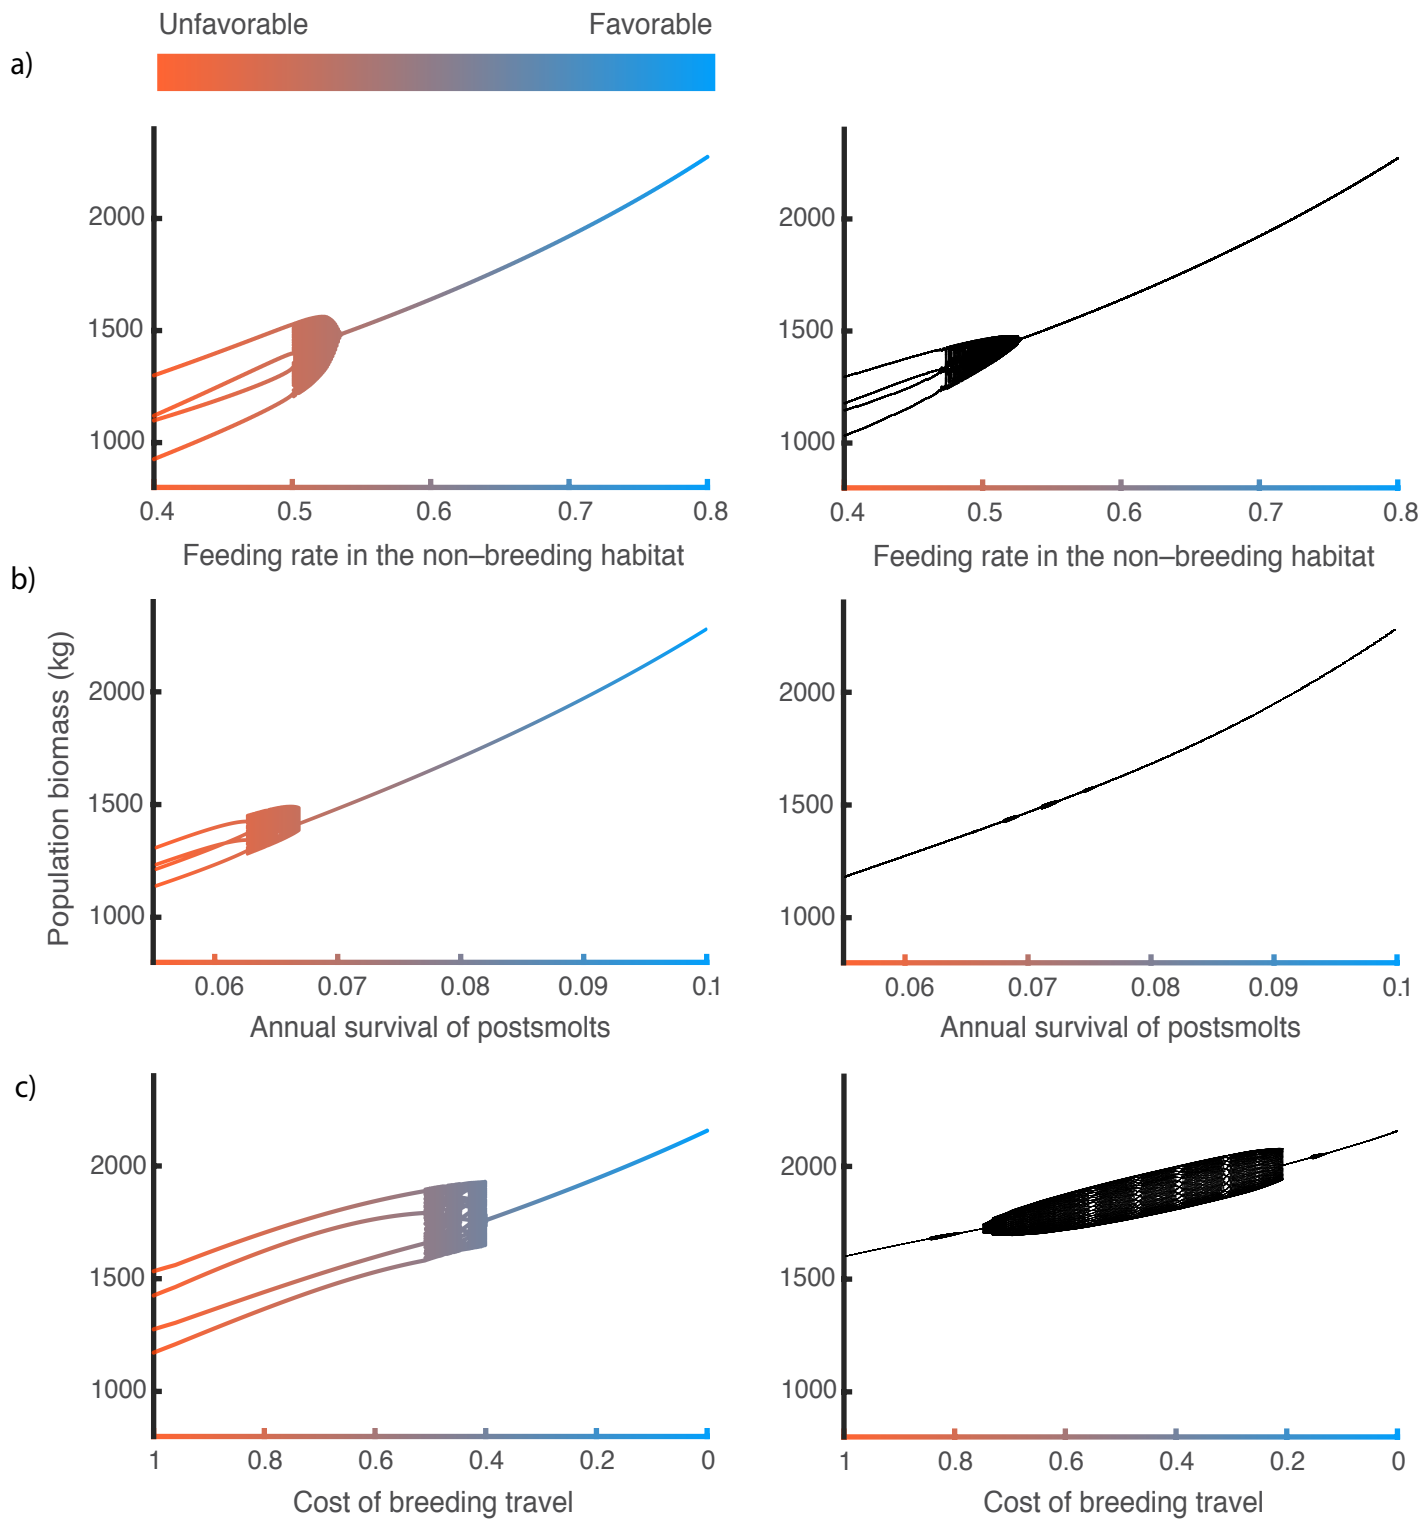

Figure SI2.3

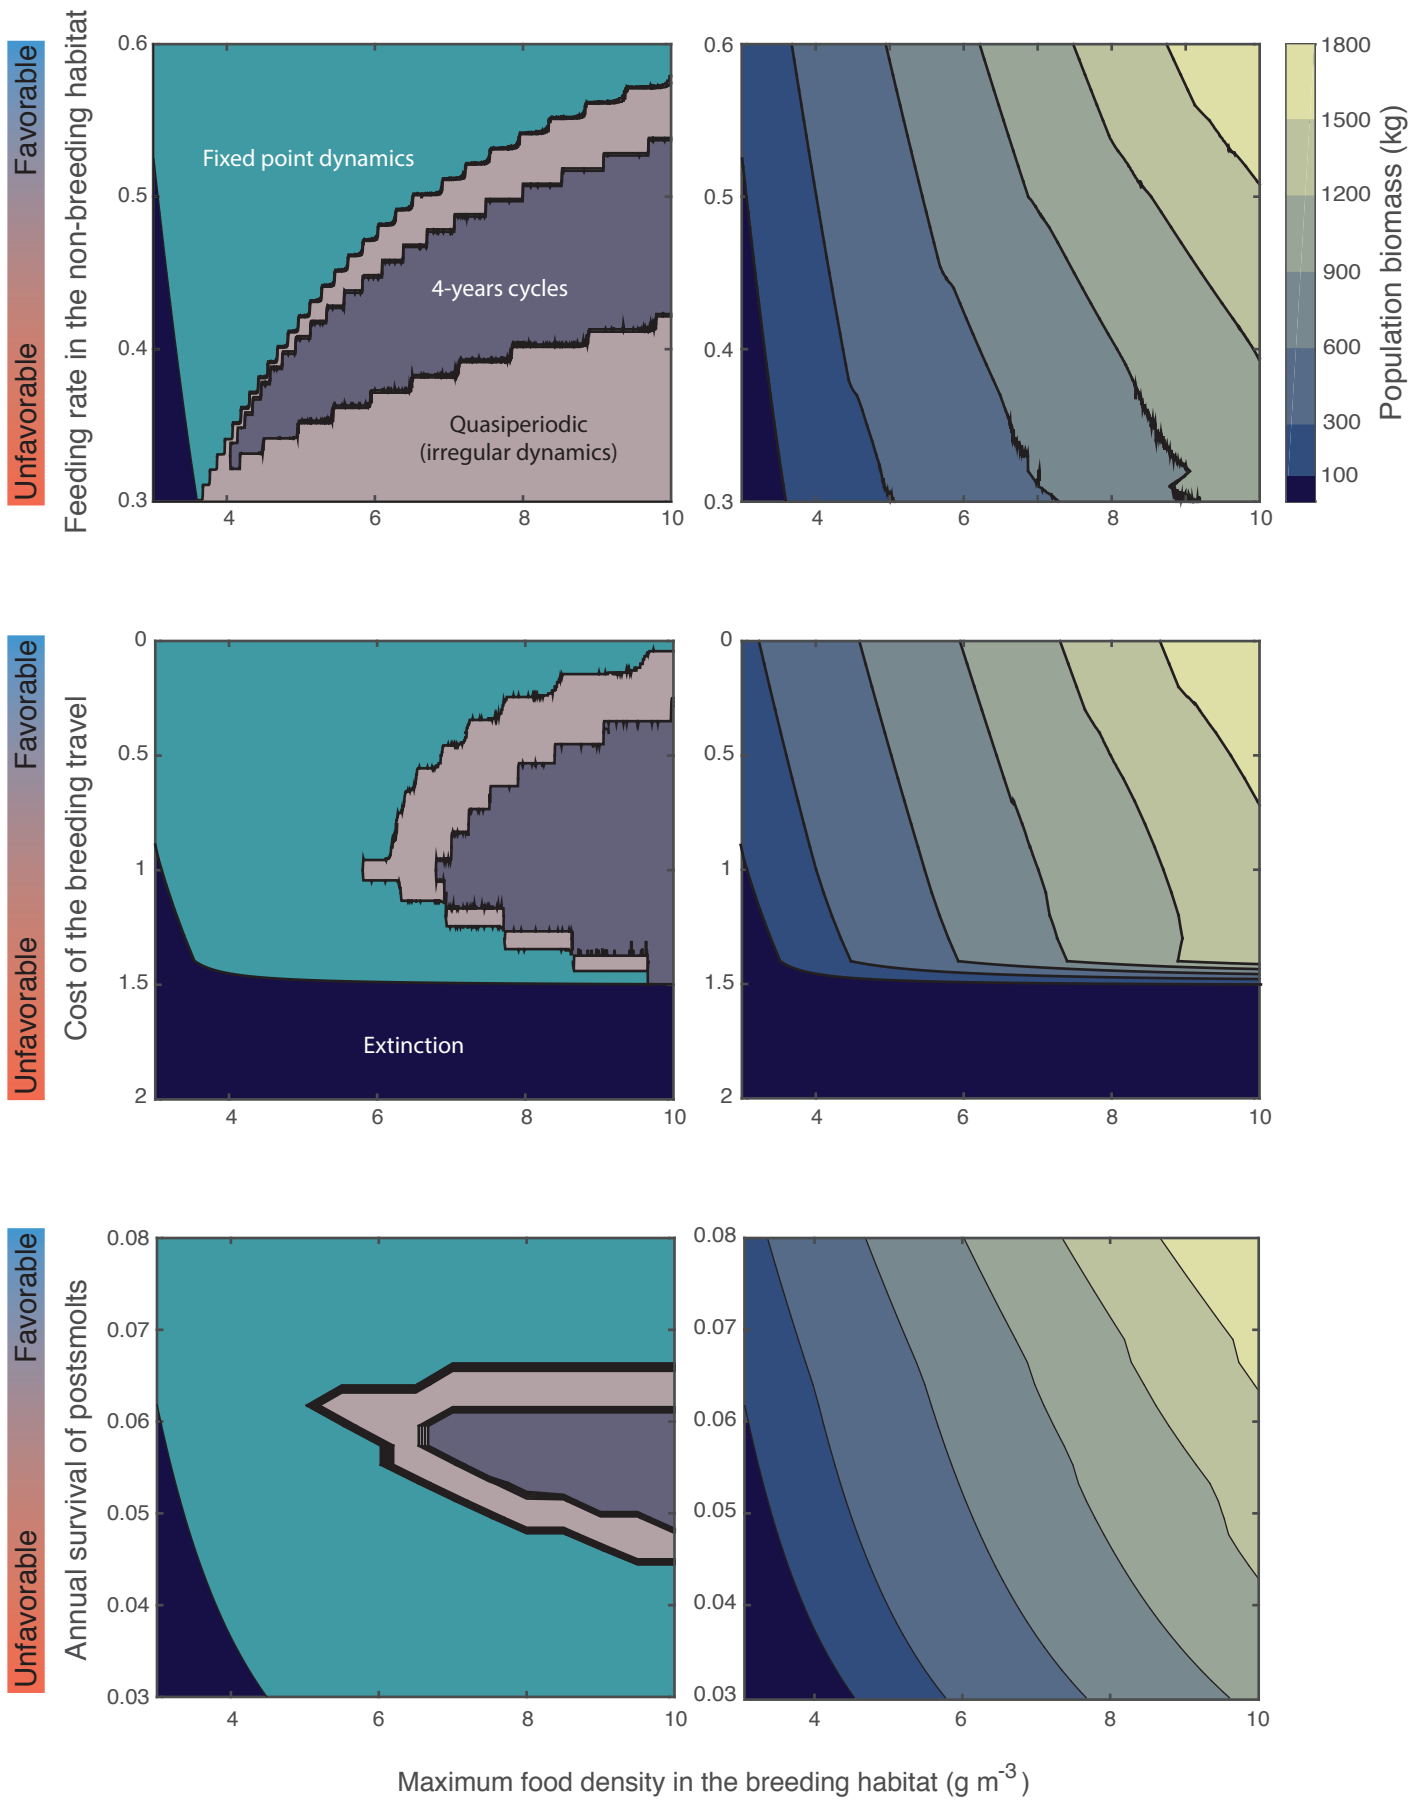

Figure SI3.1.

Supplement: JANE-88-1178-s001.pdf [file JANE-88-1178-s001.pdf]
